# Supplementary material
Source: PubMed Central journal article supplement (PMC4060155)
Supplement: NIHMS580555-supplement-supplement_1.pdf [file NIHMS580555-supplement-supplement_1.pdf]

## Appendix

### Supplementary Figure 1

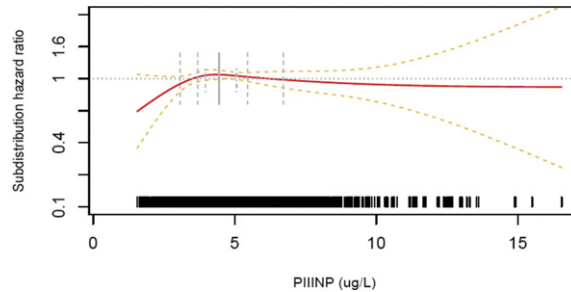

Sub-HRs and 95% CIs for incident AF according to PIIINP. Model adjusted for age, sex, race, clinic, systolic blood pressure, hypertensive medication, BMI, BMI-squared, height, smoking status, and prevalent CHF, MI, or diabetes. Fit using the Fine-Gray model relating PIIINP to AF in the presence of competing risk of death. Modeled using natural spline with  $df=3$ . The solid vertical line represents the median; the dashed vertical lines represent the location of the knots for the spline (the 33.3rd and 66.6th quantiles of PIIINP; 3.96 and 5.06  $\mu\text{g/L}$ , respectively). The orange dashed lines represent the 95% CI of the estimated HR.

### Supplementary Figure 2

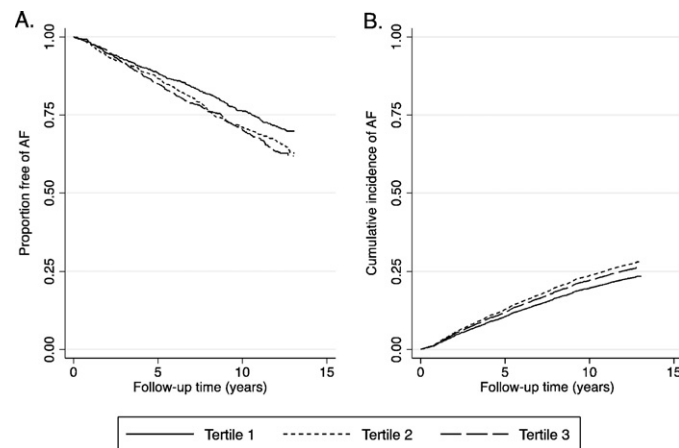

**A**, Unadjusted Kaplan-Meier survival curves. **B**, Cumulative incidence curves (based on the Fine and Gray method), according to tertiles of PIIINP. Tertile 1: 0.54-3.96  $\mu\text{g/L}$ ; tertile 2: 3.96-5.06  $\mu\text{g/L}$ ; tertile 3: 5.06-17.50  $\mu\text{g/L}$ . Cumulative incidence curves based on competing risks analysis (see [Methods](#) for details), with adjustment for age, sex, race, clinic, systolic blood pressure, hypertensive medication, BMI, BMI-squared, height, smoking status, and prevalent CHF, MI, or diabetes. Fit using the Fine-Gray model relating PIIINP to AF in the presence of competing risk of death.

**Supplementary Table I.** Demographic, clinical, and biological characteristics of CHS participants who were free of prevalent AF and participated in the 1996 to 1997 examination and have data available (n = 873) but are missing both PIIINP and TGF- $\beta$ 1 values

|                        | n   |                |
|------------------------|-----|----------------|
| <b>Demographics</b>    |     |                |
| Age (y)                | 873 | 80.1 $\pm$ 5.6 |
| Male sex               | 873 | 30.7%          |
| African American race  | 873 | 19.1%          |
| Current smoking        | 633 | 8.8%           |
| <b>Medical history</b> |     |                |
| Treated HTN            | 678 | 57.4%          |
| CHF                    | 873 | 10.8%          |
| MI                     | 873 | 14.0%          |
| Stroke                 | 873 | 11.9%          |

Values for age are shown as mean  $\pm$  SD.

**Supplementary Table II.** Demographic, clinical, and biological characteristics of CHS participants free of prevalent AF at the 1996 to 1997 examination

|                                                | PIIINP           | TGF- $\beta$ 1   |
|------------------------------------------------|------------------|------------------|
| <b>Demographics</b>                            |                  |                  |
| n                                              | 2935             | 1538             |
| Age (y)                                        | 77.9 $\pm$ 4.7   | 77.8 $\pm$ 4.6   |
| Male sex, n (%)                                | 1116 (38.0%)     | 583 (37.9)       |
| African American race, n (%)                   | 494 (16.8)       | 354 (23.0)       |
| Current smoking, n (%)                         | 227 (7.7)        | 141 (9.2)        |
| Height (cm)                                    | 163.3 $\pm$ 9.4  | 163.3 $\pm$ 9.5  |
| <b>Medical history</b>                         |                  |                  |
| Treated HTN, n (%)                             | 1639 (55.8)      | 866 (56.3)       |
| Diabetes, n (%)                                | 535 (18.3)       | 288 (18.8)       |
| CHF, n (%)                                     | 207 (7.1)        | 95 (6.2)         |
| MI, n (%)                                      | 282 (9.6)        | 145 (9.4)        |
| Stroke, n (%)                                  | 165 (5.6)        | 74 (4.8)         |
| <b>ECG</b>                                     |                  |                  |
| Heart rate (beats/min)                         | 63.5 $\pm$ 10.3  | 63.3 $\pm$ 10.3  |
| PR interval (ms)                               | 172.9 $\pm$ 30.8 | 172.2 $\pm$ 31.4 |
| QRS interval (ms)                              | 94.4 $\pm$ 18.7  | 93.8 $\pm$ 18.2  |
| <b>Cardiac</b>                                 |                  |                  |
| Normal LVEF, n (%)                             | 2421 (87.4)      | 1312 (89.9)      |
| <b>Biomarkers</b>                              |                  |                  |
| Log <sub>2</sub> BNP (pg/mL)                   | 6.8 $\pm$ 1.4    | 6.7 $\pm$ 1.4    |
| Log <sub>2</sub> CRP (mg/L)                    | 1.3 $\pm$ 1.6    | 1.3 $\pm$ 1.6    |
| Cystatin C (mg/L)                              | 1.1 $\pm$ 0.4    | 1.1 $\pm$ 0.3    |
| GFR-cystatin (mL/min per 1.73 m <sup>2</sup> ) | 71.2 $\pm$ 19.4  | 72.2 $\pm$ 19.4  |

Values are shown as mean  $\pm$  SD, unless otherwise specified.

Abbreviations: HTN, Hypertension; LA, left atrial; LVEF, left ventricular ejection fraction; BNP, brain natriuretic peptide; CRP, C-reactive protein; GFR-cystatin, GFR estimate using cystatin C.

**Supplementary Table III.** HRs and 95% CIs for incident AF according to PIIINP level, including adjustment for class of antihypertensive

| PIIINP               | HR (95% CI)      |
|----------------------|------------------|
| 10% (3.07 $\mu$ g/L) | 0.84 (0.72-0.99) |
| 25% (3.69 $\mu$ g/L) | 0.92 (0.87-0.98) |
| 50% (4.45 $\mu$ g/L) | 1.0 (referent)   |
| 75% (5.45 $\mu$ g/L) | 1.07 (0.98-1.18) |
| 90% (6.72 $\mu$ g/L) | 1.13 (0.95-1.34) |

Adjusted for age, sex, race, clinic site, systolic blood pressure,  $\beta$ -blockers, angiotensin-converting enzyme inhibitors, diuretics, BMI, BMI-squared, height, smoking status, history of CHF, MI, or prevalent diabetes. Modeled using natural cubic spline with  $df=3$  and 2 knots at 33.3rd and 66.6th quantiles of PIIINP (3.96 and 5.06  $\mu$ g/L, respectively). Each estimate is the HR for an individual with that value of PIIINP compared with the median value (predicted from model).
